# Supplementary material for: Facile synthesis of N-doped graphene quantum dots as a fluorescent sensor for Cr(vi) and folic acid detection
Source: PubMed Central journal article supplement — RSC Adv. 2024 Aug 22;14(36):26667–73. doi: 10.1039/d4ra05016a (PMC11340008; doi:10.1039/d4ra05016a), 2024-08-22
Supplement: RA-014-D4RA05016A-s001.pdf [file RA-014-D4RA05016A-s001.pdf]

## Supplementary Information

### Facile synthesis of N-doped graphene quantum dots as fluorescent sensor for Cr(VI) and folic acid detection

Chu-Sen Ni,<sup>‡a</sup> Wen-Jie Zhang,<sup>‡a</sup> Wen-Zhu Bi,<sup>\*a,b</sup> Ming-Xia Wu,<sup>\*a,b</sup> Su-Xiang Feng,<sup>\*b,c,d</sup> Xiao-Lan Chen<sup>e</sup> and Ling-Bo Qu<sup>e</sup>

<sup>a</sup> School of Pharmacy, Henan University of Chinese Medicine, Zhengzhou, 450046, China. E-mail: mxwu711@163.com.

<sup>b</sup> Henan Engineering Research Center of Modern Chinese Medicine Research, Development and Application, Zhengzhou, 450046, China.

<sup>c</sup> Academy of Chinese Medical Sciences, Henan University of Chinese Medicine, Zhengzhou, 450046, China. E-mail: fengsx221@163.com.

<sup>d</sup> Collaborative Innovation Center for Chinese Medicine and Respiratory Diseases co-constructed by Henan province & Education Ministry of P. R. China, Zhengzhou, 450046, China.

<sup>e</sup> College of Chemistry, Zhengzhou University, Zhengzhou, 450001, China.

<sup>‡</sup> These authors contributed equally to this work and should be considered as co-first authors.

Corresponding E-mail: biwenzhu2018@hactcm.edu.cn

#### Table of Contents

|                                                                                          |     |
|------------------------------------------------------------------------------------------|-----|
| 1. Comparison of carbon dots-based fluorescence probes for Cr(VI) detection.....         | S2  |
| 2. Comparison of carbon dots-based fluorescence probes for FA detection.....             | S4  |
| 3. Materials and instruments.....                                                        | S6  |
| 4. Optimization of the hydrothermal reaction conditions for the synthesis of N-GQDs..... | S6  |
| 5. FTIR spectrum of N-GQDs.....                                                          | S7  |
| 6. Calculation of fluorescence quantum yield of N-GQDs.....                              | S8  |
| 7. Thermostability, photostability and reproducibility of N-GQDs .....                   | S9  |
| 8. General experimental procedure.....                                                   | S9  |
| 9. Fluorescence detection of Cr(VI).....                                                 | S10 |
| 10. Response time of N-GQDs to Cr(VI).....                                               | S11 |
| 11. Photographs of N-GQDs solution with Cr(VI) .....                                     | S11 |
| 12. Fluorescence intensity and standard deviation.....                                   | S12 |
| 13. Fluorescence detection of FA.....                                                    | S12 |
| 14. The response time of N-GQDs to FA.....                                               | S13 |
| 15. Photographs of N-GQDs solution with FA.....                                          | S13 |
| 16. Exploration of the quenching mechanism by calculation methods.....                   | S14 |

**1. Table S1 Comparison of carbon dots-based fluorescence probes for Cr(VI) detection**

| No. | Carbon Dots                                            | Linear range       | Limit of detection | Fluorescence quantum yield | Response time | Reference                                                                       |
|-----|--------------------------------------------------------|--------------------|--------------------|----------------------------|---------------|---------------------------------------------------------------------------------|
| 1   | EDTA/DMF derived CDs                                   | 0-0.1 M            | 10 $\mu$ M         | /                          | 5 min         | <i>Front. Chem.</i> , 2020, <b>8</b> , 595628                                   |
| 2   | MR-CDs                                                 | 0.2-50 $\mu$ M     | 20 nM              | 18%                        | 10 min        | <i>Nanomaterials</i> , 2020, <b>10</b> , 1924                                   |
| 3   | B,N-CDs                                                | 0.3-500 $\mu$ M    | 0.24 $\mu$ M       | 59.01%                     | 8 min         | <i>Spectrochim. Acta. A Mol. Biomol. Spectrosc.</i> , 2020, <b>243</b> , 118807 |
| 4   | BNCDs                                                  | 0-100 $\mu$ M      | 0.41 $\mu$ M       | /                          | /             | <i>Carbon</i> , 2021, <b>182</b> , 42                                           |
| 5   | N,P-CDs                                                | 0.05-3 $\mu$ M     | 26 nM              | 1.8%                       | 10 min        | <i>Microchem. J.</i> , 2021, <b>166</b> , 106219                                |
| 6   | CDs                                                    | 120 nM-200 $\mu$ M | 37 nM              | /                          | 10 min        | <i>Microchem. J.</i> , 2021, <b>169</b> , 106552                                |
| 7   | BH@CD                                                  | 0-20 $\mu$ M       | 66 nM              | /                          | /             | <i>Sens. Actuators B Chem.</i> , 2021, <b>348</b> , 130662                      |
| 8   | N,S-CDs                                                | 0-120 $\mu$ M      | 1.04 $\mu$ M       | 4.37%                      | 5 min         | <i>RSC Adv.</i> 2021, <b>11</b> , 35946                                         |
| 9   | af-CDs                                                 | 0.8-80.0 $\mu$ M   | 242 nM             | 2.3%                       | 1 min         | <i>J. Photochem. Photobiol. A Chem.</i> , 2021, <b>417</b> , 113359             |
| 10  | NH <sub>2</sub> - mSiO <sub>2</sub> @CDs               | 0.5-9 $\mu$ M      | 5 nM               | /                          | 1 min         | <i>J. Hazard. Mater.</i> , 2021, <b>415</b> , 125699                            |
| 11  | S,N-CDs                                                | 0.03-50 $\mu$ M    | 21.14 nM           | 17%                        | 3 min         | <i>Microchem. J.</i> , 2021, <b>167</b> , 106284                                |
| 12  | Cs-CDs                                                 | 1-130 $\mu$ M      | 0.91 $\mu$ M       | 58%                        | /             | <i>Nano</i> , 2021, <b>16</b> , 2150103                                         |
| 13  | CA/WS-CDs                                              | 10-50 mg/L         | 7.6 mg/L           | /                          | /             | <i>Environ. Sci.: Nano</i> , 2021, <b>8</b> , 3331                              |
| 14  | PGP-CDs                                                | 0.1-100 $\mu$ M    | 4 nM               | 15%                        | 1 min         | <i>J. Mol. Liq.</i> , 2022, <b>346</b> , 117088                                 |
| 15  | O-phenylenediamine/<br>DL-Thioctic acid derived<br>CDs | 0-60 $\mu$ M       | 0.64 $\mu$ M       | 21.82%                     | /             | <i>Colloids Surf. A Physicochem. Eng. Aspects</i> , 2022, <b>638</b> , 128164   |
| 16  | Single-layered GQDs                                    | 3-75 $\mu$ M       | 0.1 $\mu$ M        | 23.8%                      | /             | <i>Chem. Eng. J.</i> , 2022, <b>435</b> , 131833                                |
| 17  | CNF-TCDs3                                              | 0-15 mg/L          | 0.15 mg/L          | /                          | /             | <i>Chem. Eng. J.</i> , 2022, <b>432</b> , 134202                                |

|    |                                                         |                                                                   |                                                            |        |               |                                                                                 |
|----|---------------------------------------------------------|-------------------------------------------------------------------|------------------------------------------------------------|--------|---------------|---------------------------------------------------------------------------------|
| 18 | CF-CDs                                                  | 5-50 $\mu\text{M}$                                                | 1.7 ppm                                                    | /      | /             | <i>J. Basic Microbiol.</i> , 2022, <b>62</b> , 455                              |
| 19 | Poria cocos polysaccharide/ethylene diamine derived CDs | 1-100 $\mu\text{M}$                                               | 0.25 $\mu\text{M}$                                         | 4.82%  | 25 min        | <i>J. Pharm. Anal.</i> , 2022, <b>12</b> , 104                                  |
| 20 | R-CDs                                                   | 0.3-50 $\mu\text{M}$ /0.03-3 $\mu\text{M}$                        | 80 nM/9.1 nM                                               | 22.96% | 10 min        | <i>Biosensors</i> , 2022, <b>12</b> , 432                                       |
| 21 | N-CDs                                                   | 1-80 $\mu\text{M}$                                                | 00.61 $\mu\text{M}$                                        | 31%    | /             | <i>Nano.</i> , 2022, <b>17</b> , 2250086                                        |
| 22 | N,S-CDs                                                 | 0-0.588 ppm                                                       | 0.038 ppm                                                  | /      | 5 min         | <i>Chem. Pap.</i> , 2022, <b>76</b> , 7793                                      |
| 23 | L-tartaric acid/citric acid/urea derived CDs            | 0.8-189 $\mu\text{M}$                                             | 0.16 $\mu\text{M}$                                         | 20.5%  | instantaneous | <i>Spectrochim. Acta. A Mol. Biomol. Spectrosc.</i> , 2022, <b>278</b> , 121343 |
| 24 | N,P-CDs                                                 | 0.68-87.38 $\mu\text{M}$                                          | 0.18 $\mu\text{M}$                                         | 11.3%  | 10 min        | <i>J. Anal. Test.</i> , 2022, <b>6</b> , 335                                    |
| 25 | CD-600                                                  | 0.1-0.4 nM                                                        | 0.04 nM                                                    | 2-3%   | /             | <i>Chem. Eng. J.</i> , 2022, <b>446</b> , 137171                                |
| 26 | SNCDs                                                   | 5 nM-25 $\mu\text{M}$                                             | 5 nM                                                       | 17.67% | /             | <i>J. Lumin.</i> , 2022, <b>244</b> , 118767                                    |
| 27 | N,S-doped CDs                                           | 3.8-38.9 $\mu\text{M}$                                            | 47.2 nM                                                    | 16%    | /             | <i>Anal. Bioanal. Chem.</i> , 2022, <b>414</b> , 7253                           |
| 28 | N-CQDs                                                  | 0-15 $\mu\text{M}$                                                | 300 nM                                                     | 18%    | 4 min         | <i>Diam. Relat. Mater.</i> , 2022, <b>126</b> , 109138                          |
| 29 | banana stem/phosphoric acid derived CDs                 | 10-30 $\mu\text{M}$                                               | 2.4 $\mu\text{M}$                                          | 15.11% | 20 sec        | <i>Mater. Chem. Phys.</i> , 2022, <b>286</b> , 126133                           |
| 30 | N-CQDs                                                  | 0 -100 $\mu\text{M}$                                              | 2.1 $\mu\text{M}$                                          | 22.1%  | /             | <i>Anal. Chim. Acta</i> , 2022, <b>1195</b> , 339478                            |
| 31 | CE-CDs                                                  | 0-500 $\mu\text{M}$ /0-5 $\mu\text{M}$                            | 1.56 $\mu\text{M}$ /23 nM                                  | 72%    | 3 min         | <i>Ecotox. Environ. Saf.</i> , 2022, <b>244</b> , 114069                        |
| 32 | FW-CDs                                                  | 0.1-60 $\mu\text{M}$                                              | 0.07 $\mu\text{M}$                                         | 14.8%  | 30 min        | <i>Molecules</i> , 2022, <b>27</b> , 1258                                       |
| 33 | Citric acid/glutamic acid derived CDSs                  | 0.5-400 $\mu\text{M}$                                             | 0.1 $\mu\text{M}$                                          | 48.41% | 1 min         | <i>J. Fluoresc.</i> , 2022, <b>32</b> , 2343                                    |
| 34 | Arg-L-CQDs                                              | 0-400 $\mu\text{M}$                                               | 0.8625 $\mu\text{M}$                                       | /      | /             | <i>Macromol. Chem. Phys.</i> , 2023, <b>224</b> , 2200380                       |
| 35 | N,Cl-doped CQDs                                         | 5-350 $\mu\text{M}$ /250-600 $\mu\text{M}$ /300-850 $\mu\text{M}$ | 0.28 $\mu\text{M}$ /0.87 $\mu\text{M}$ /0.90 $\mu\text{M}$ | 3.58%  | 5 min         | <i>Colloids Surf. A Physicochem. Eng. Aspects</i> , 2023, <b>669</b> , 131471   |
| 36 | N/S-GQDs                                                | 1-100 $\mu\text{M}$ /0.5-10 $\mu\text{M}$                         | 0.01 $\mu\text{M}$ /0.4 $\mu\text{M}$                      | 22%    | 10 min        | <i>Langmuir</i> , 2023, <b>39</b> , 1538                                        |

|           |                |                                      |                                      |              |                    |                                                          |
|-----------|----------------|--------------------------------------|--------------------------------------|--------------|--------------------|----------------------------------------------------------|
| 37        | N-QDs          | 0-40 $\mu\text{M}$                   | 0.16 $\mu\text{M}$                   | /            | /                  | <i>J. Fluoresc.</i> , 2023, <b>139</b> , 1573            |
| 38        | BCD1           | 0-220 $\mu\text{M}$                  | 0.242 $\mu\text{M}$                  | 8.9%         | 15 min             | <i>ACS Omega</i> , 2023, <b>8</b> , 6550                 |
| 39        | CQDs           | 20-200 $\mu\text{M}$                 | 1.4 $\mu\text{M}$                    | 5.6%         | /                  | <i>Packag. Technol. Sci.</i> , 2023, <b>36</b> , 465     |
| 40        | N,Zn-doped CDs | 0.005-0.135 $\mu\text{M}$            | 0.47 nM                              | 13.6%        | /                  | <i>Sensors</i> , 2023, <b>23</b> , 1632                  |
| 41        | N-CDs-CTAC     | 0.5-1000 $\mu\text{M}$               | 40 nM                                | 44.6%        | 10 min             | <i>Analyst</i> , 2023, <b>148</b> , 2818                 |
| 42        | ILCDs          | 1-750 $\mu\text{M}$                  | 0.5 $\mu\text{M}$                    | 16.34%       | 35 min             | <i>Ind. Eng. Chem. Res.</i> , 2023, <b>62</b> , 10849    |
| 43        | S-CDs          | 10-80 nM                             | 20 nM                                | 3%           | /                  | <i>J. Environ. Chem. Eng.</i> , 2023, <b>11</b> , 109438 |
| <b>44</b> | <b>N-GQDs</b>  | <b>0-50 <math>\mu\text{M}</math></b> | <b>0.80 <math>\mu\text{M}</math></b> | <b>10.9%</b> | <b>&lt; 10 sec</b> | <b>This work</b>                                         |

**2. Table S2 Comparison of carbon dots-based fluorescence probes for FA detection**

| No. | Carbon Dots                       | Linear range             | Limit of detection | Fluorescence quantum yield | Response time | Reference                                                                       |
|-----|-----------------------------------|--------------------------|--------------------|----------------------------|---------------|---------------------------------------------------------------------------------|
| 1   | N,S-GQD-NaHSO <sub>3</sub> -NaClO | 0.5-70 $\mu\text{M}$     | 78 nM              | 77.2%                      | /             | <i>Food Anal. Methods</i> , 2019, <b>12</b> , 869                               |
| 2   | Amino QDs-Carboxyl GQDs           | 0.11-22.66 nM            | 0.09 nM            | /                          | /             | <i>Anal. Bioanal. Chem.</i> , 2019, <b>411</b> , 7481                           |
| 3   | CA/EIP CQDs                       | 1.14-47.57 $\mu\text{M}$ | 0.38 $\mu\text{M}$ | /                          | /             | <i>Spectrochim. Acta. A Mol. Biomol. Spectrosc.</i> , 2020, <b>229</b> , 117931 |
| 4   | N,S,I-CDs                         | 0.1-175 $\mu\text{M}$    | 84 nM              | 32.4%                      | 5 min         | <i>Spectrochim. Acta. A Mol. Biomol. Spectrosc.</i> , 2020, <b>224</b> , 117444 |
| 5   | CDs-MCM                           | 0-50 $\mu\text{M}$       | 118.73 nM          | 10.39%                     | /             | <i>Nano</i> , 2020, <b>15</b> , 2050090                                         |
| 6   | HCA-CDs                           | 4-100 $\mu\text{M}$      | 0.49 $\mu\text{M}$ | /                          | 5 min         | <i>Microchem. J.</i> , 2020, <b>159</b> , 105364                                |
| 7   | paper@CDs                         | 1-300 $\mu\text{M}$      | 0.28 $\mu\text{M}$ | /                          | 12 min        | <i>Anal. Bioanal. Chem.</i> , 2020, <b>412</b> , 2805                           |
| 8   | NGQDs                             | 0.8-80 $\mu\text{M}$     | 81.7 nM            | /                          | 10 min        | <i>ACS Appl. Mater. Interfaces</i> , 2021, <b>13</b> , 34572                    |

|           |                                                   |                                       |                                     |              |                    |                                                                                 |
|-----------|---------------------------------------------------|---------------------------------------|-------------------------------------|--------------|--------------------|---------------------------------------------------------------------------------|
| 9         | C60 FNP                                           | 0-80 $\mu\text{M}$                    | 0.24 $\mu\text{M}$                  | 26%          | 1 min              | <i>Nanotechnology</i> , 2021, <b>32</b> , 195501                                |
| 10        | Carbon Nanodots-Quantum Dots Composite            | 0.113-906 $\mu\text{M}$               | 0.039 $\mu\text{M}$                 | /            | /                  | <i>Food Anal. Methods</i> , 2021, <b>14</b> , 1637                              |
| 11        | N-CDs                                             | 0-200 $\mu\text{M}$                   | 28 nM                               | 26.5%        | 3 min              | <i>Spectrochim. Acta. A Mol. Biomol. Spectrosc.</i> , 2022, <b>268</b> , 120661 |
| 12        | PEI-OH-CDs                                        | 0.1-100 $\mu\text{M}$                 | 0.07 $\mu\text{M}$                  | 25%          | 5 min              | <i>J. Chin. Chem. Soc.</i> , 2022, <b>69</b> , 486                              |
| 13        | S,O-CNQDs                                         | 5-83.3 $\mu\text{M}$                  | 90 nM                               | /            | 5 min              | <i>Arab. J. Chem.</i> , 2023, <b>16</b> , 104520                                |
| 14        | N-CDs                                             | 0.1-165 $\mu\text{M}$                 | 0.04 $\mu\text{M}$                  | 7.65%        | 1 min              | <i>Spectrochim. Acta. A Mol. Biomol. Spectrosc.</i> , 2023, <b>285</b> , 121891 |
| 15        | Gd,N-CDs                                          | 0-30 $\mu\text{M}$                    | 3.43 nM                             | 2.52%        | 1 min              | <i>Dyes Pigments</i> , 2023, <b>209</b> , 110877                                |
| 16        | Mn,N-CQDs                                         | 2-100 $\mu\text{M}$                   | 0.19 ppm                            | 37%          | 60 min             | <i>J. Nanopart. Res.</i> , 2023, <b>25</b> , 92                                 |
| 17        | N,S,P-CDs                                         | 4.85-82.45 $\mu\text{M}$              | 0.148 $\mu\text{M}$                 | 41%          | /                  | <i>Dalton Trans.</i> , 2023, <b>52</b> , 6551                                   |
| 18        | Anhydrous citric acid/ethylenediamine derived CDs | 0-50 nM                               | 6 nM                                | 30%          | /                  | <i>Microchem. J.</i> , 2023, <b>188</b> , 108470                                |
| <b>19</b> | <b>N-GQDs</b>                                     | <b>0-200 <math>\mu\text{M}</math></b> | <b>2.1 <math>\mu\text{M}</math></b> | <b>10.9%</b> | <b>&lt; 10 sec</b> | <b>This work</b>                                                                |

### 3. Materials and instruments

All reagents used in this work showed below were purchased from commercial suppliers without further purification. Soluble starch ( $C_{12}H_{22}O_{11}$ , CAS: 9005-84-9), L-arginine (L-Arg,  $C_6H_{14}N_4O_2$ , CAS: 74-79-3), glucose ( $C_6H_{12}O_6$ , CAS: 50-99-7), starch ( $(C_6H_{10}O_5)_n$ , CAS: 9005-25-8), glutathione (GSH,  $C_{10}H_{17}N_3O_6S$ ), serine (Ser,  $C_3H_7NO_3$ ), glycine (Gly,  $C_2H_5NO_2$ ), alanine (Ala,  $C_3H_7NO_2$ ), L-threonine (L-Thr,  $C_4H_9NO_3$ ), L-cysteine (L-Cys,  $C_3H_7NO_2S$ ), L-lysine (L-Lys,  $C_6H_{14}N_2O_2$ ), L-glutamic acid (L-Glu,  $C_5H_9NO_4$ ), L-histidine (L-His,  $C_6H_9N_3O_2$ ), folic acid (FA,  $C_{19}H_{19}N_7O_6$ ), ascorbic acid (AA,  $C_6H_8O_6$ ), vitamin B6 (VB6,  $C_8H_{11}NO_3 \cdot HCl$ ), nicotinamide ( $C_6H_6N_2O$ ), citric acid (CA,  $C_6H_8O_7$ ), urea ( $CH_4N_2O$ ), silver nitrate ( $AgNO_3$ ), aluminum chloride ( $AlCl_3$ ), barium chloride dihydrate ( $BaCl_2 \cdot 2H_2O$ ), calcium chloride ( $CaCl_2$ ), cadmium sulfate 8/3-hydrate ( $3CdSO_4 \cdot 8H_2O$ ), cobalt sulfate heptahydrate ( $CoSO_4 \cdot 7H_2O$ ), chromium (III) trichloride hexahydrate ( $CrCl_3 \cdot 6H_2O$ ), dichromate potassium dichromate ( $K_2Cr_2O_7$ ), cupric sulfate ( $CuSO_4$ ), ferric chloride hexahydrate ( $FeCl_3 \cdot 6H_2O$ ), mercury(II) thiocyanate ( $Hg(SCN)_2$ ), potassium bromide (KBr), potassium chloride (KCl), potassium carbonate ( $K_2CO_3$ ), potassium iodide (KI), potassium phosphate ( $K_3PO_4$ ), manganese (II) chloride tetrahydrate ( $MnCl_2 \cdot 4H_2O$ ), sodium perchlorate ( $NaClO_4$ ), sodium fluoride (NaF), sodium sulfate ( $Na_2SO_4$ ), ammonium chloride ( $NH_4Cl$ ), nickel(II) chloride ( $NiCl_2$ ), lead(II) nitrate ( $Pb(NO_3)_2$ ), stannous chloride dihydrate ( $SnCl_2 \cdot 2H_2O$ ), zinc sulfate heptahydrate ( $ZnSO_4 \cdot 7H_2O$ ). Sucrose ( $C_{12}H_{22}O_{11}$ ) was obtained from the local supermarket.

Fluorescence spectra were measured by Hitachi F7000 with the slit width of 5/5 nm. Other instruments employed in this work are UV-Visible spectrophotometer (Thermo Evolution 260 Bio), pH Meter (FiveEasy Plus FE28), Transmission electron microscope (TF20), Atomic force microscopy (Bruker Dimension Icon), X-ray powder diffractometer (Bruker D8 Advance), X-ray photoelectron spectrometer (Thermo ESCALAB 250), Fourier transform infrared spectrometer (Perkin Elmer Frontier), Steady-state/transient fluorescence spectrometer, Zeta potential analyzer.

### 4. Optimization of the hydrothermal reaction conditions for the synthesis of N-GQDs

Carbon sources (glucose, sucrose, soluble starch and starch) (0.15 g) and L-arginine (L-arg, 0.3-1.2 g) were firstly mixed in pure water (12.5 mL) and stirred at 60 °C for 15 min. Then, the mixture was sealed into a 25 mL stainless autoclave lined with Teflon and heated at 180-200 °C for 3-5 h. After that, the mixture was naturally cooled to room temperature and the N-GQDs were obtained by centrifugation at 15,000 rpm for 15 min. The obtained N-GQDs were stored as stock solution at room temperature for further use.

**Table S3** Optimization of the hydrothermal reaction conditions.

| Entry | Carbon source          | Nitrogen source | Temperature (°C) | Time (h) | $\lambda_{max}^{em}$ (nm) | Fluorescence intensity (a.u.) |
|-------|------------------------|-----------------|------------------|----------|---------------------------|-------------------------------|
| 1     | glucose, 0.15 g        | L-arg, 0.9 g    | 190              | 4        | 442                       | 935                           |
| 2     | sucrose, 0.15 g        | L-arg, 0.9 g    | 190              | 4        | 439                       | 637                           |
| 3     | soluble starch, 0.15 g | L-arg, 0.9 g    | 190              | 4        | 445                       | 1380                          |
| 4     | starch, 0.15 g         | L-arg, 0.9 g    | 190              | 4        | 423                       | 1181                          |
| 5     | soluble starch, 0.15 g | L-arg, 0.3 g    | 190              | 4        | 446                       | 432                           |
| 6     | soluble starch, 0.15 g | L-arg, 0.6 g    | 190              | 4        | 443                       | 816                           |
| 7     | soluble starch, 0.15 g | L-arg, 1.2 g    | 190              | 4        | 439                       | 1245                          |
| 8     | soluble starch, 0.15 g | L-arg, 0.9 g    | 180              | 4        | 425                       | 1043                          |
| 9     | soluble starch, 0.15 g | L-arg, 0.9 g    | 200              | 4        | 444                       | 819                           |
| 10    | soluble starch, 0.15 g | L-arg, 0.9 g    | 190              | 3        | 436                       | 935                           |
| 11    | soluble starch, 0.15 g | L-arg, 0.9 g    | 190              | 5        | 440                       | 1006                          |

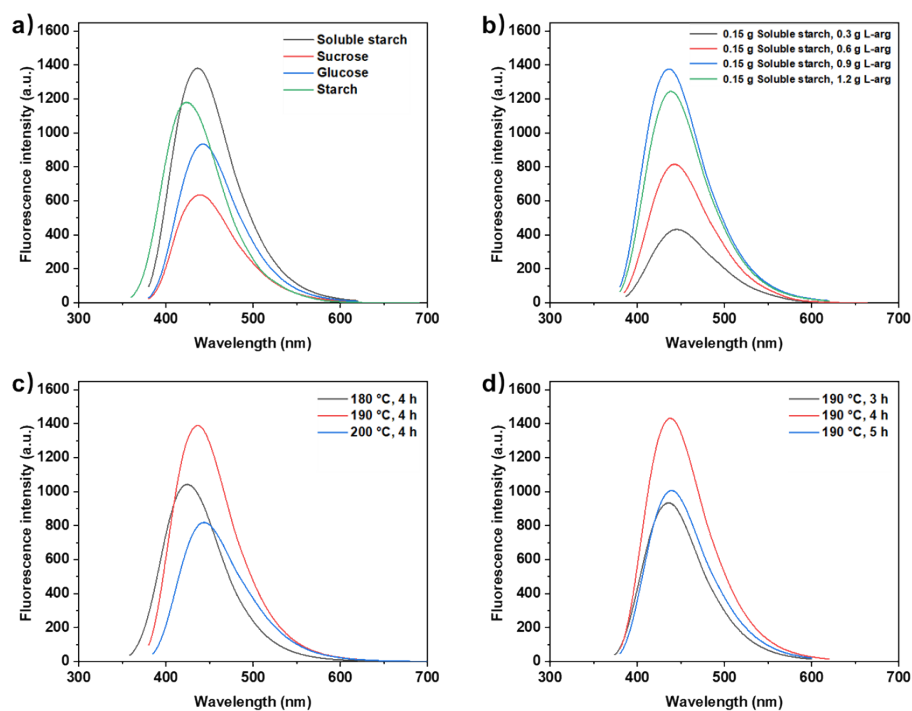

**Fig. S1** Fluorescence spectra of the as-synthesized N-GQDs under different conditions in Table S3: (a) entry 1-4; (b) entry 3, 5-7; (c) entry 3, 8-9; (d) entry 3, 10-11.

## 5. FTIR spectrum of N-GQDs

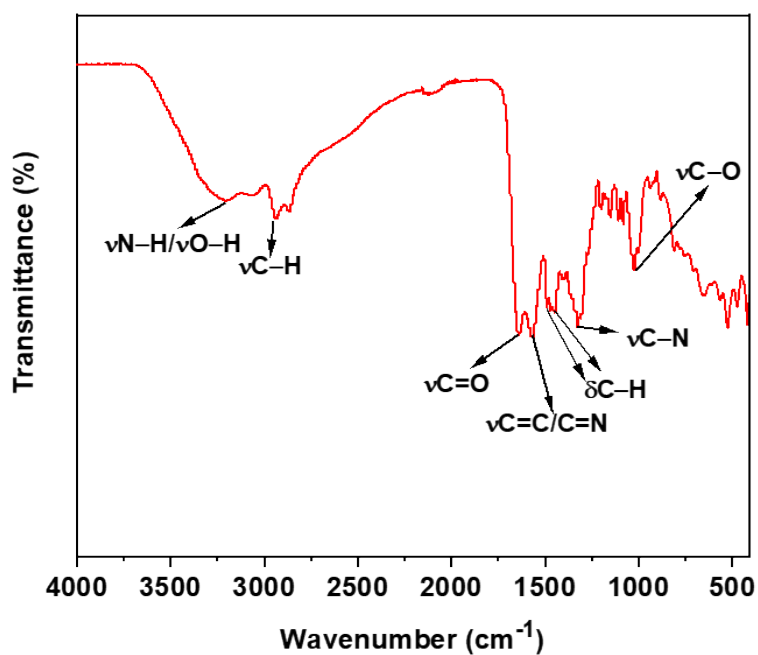

**Fig. S2** FTIR spectrum of N-GQDs.

## 6. Calculation of fluorescence quantum yield of N-GQDs

The fluorescence quantum yield (QY) of N-GQDs was determined by a common method according to previous reports using quinine sulfate in pure water as a reference (QY = 55%). The fluorescence QY value of N-GQDs was calculated as follows:

$$QY_t = QY_r \times (I_t/I_r) \times (A_r/A_t) \times (\eta_t/\eta_r)^2$$

The subscript “t” and “r” refer to the N-GQDs and quinine sulfate. A is the optical density, I is the integrated emission intensity, and  $\eta$  is the refractive index of the solvent. To get more reliable results, the absorption of the two solutions were adjusted to less than 0.1 to prevent the reabsorption effect.

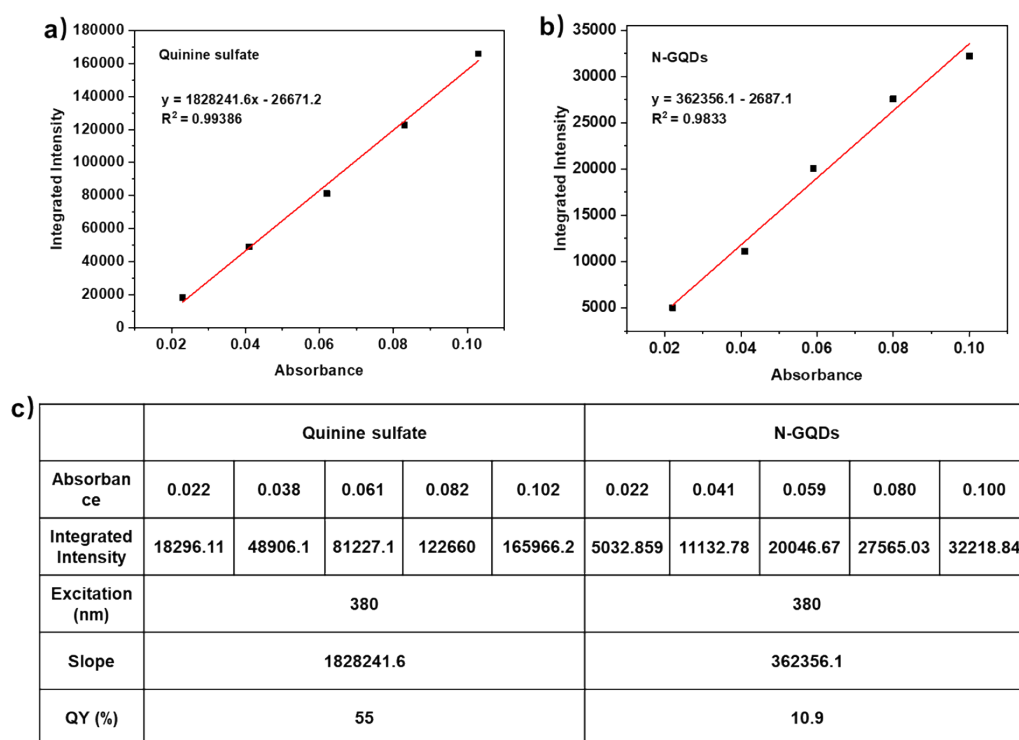

Fig. S3 Plots of integrated intensity of Quinine sulfate and N-GQDs.



## 7. Thermostability, photostability and reproducibility of N-GQDs

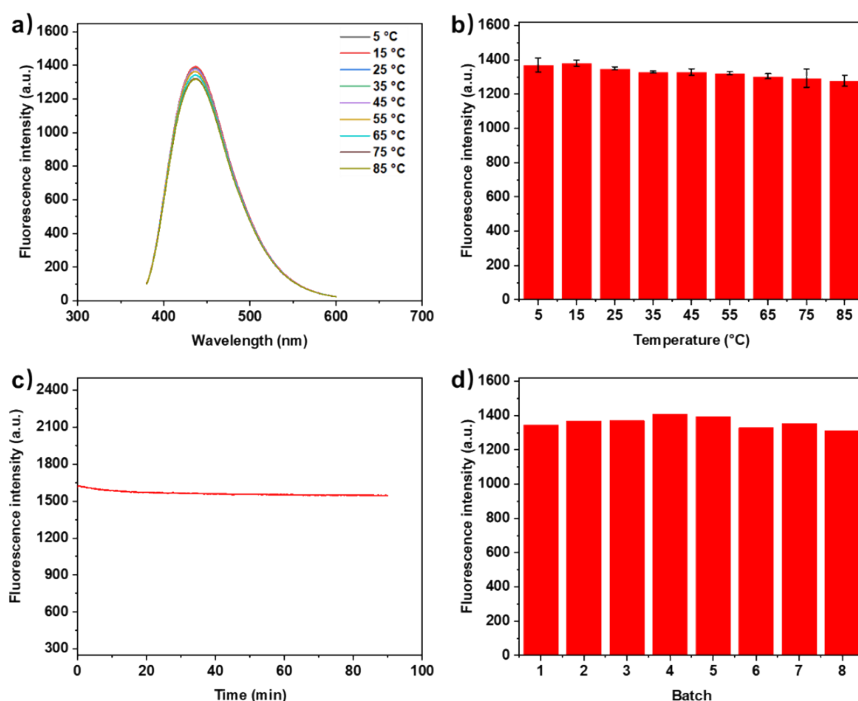

**Fig. S4** (a) Fluorescence spectra of N-GQDs under different incubation temperatures; (b-d) fluorescence intensities of N-GQDs at 445 nm: (b) under different incubation temperatures ( $n = 3$ ); (c) at continuous excitation wavelength of 370 nm; (d) between 8 different batches of N-GQDs.

## 8. General experimental procedure

### Detection of Cr(VI)

N-GQDs stock solution (500  $\mu\text{L}$ ) was firstly diluted by pure water (3.0 mL) and different amount of Cr(VI) were added. Then the solutions were further diluted by pure water to 5.0 mL. The concentrations of Cr(VI) in the solutions were 0-175  $\mu\text{M}$ . Then the fluorescence intensities of the mixed solutions were measured and repeated for 3 times. Other cations ( $\text{Ag}^+$ ,  $\text{Al}^{3+}$ ,  $\text{Ba}^{2+}$ ,  $\text{Ca}^{2+}$ ,  $\text{Cd}^{2+}$ ,  $\text{Co}^{2+}$ ,  $\text{Cr}^{3+}$ ,  $\text{Cu}^{2+}$ ,  $\text{Fe}^{3+}$ ,  $\text{Hg}^{2+}$ ,  $\text{K}^+$ ,  $\text{Mn}^{2+}$ ,  $\text{Na}^+$ ,  $\text{NH}_4^+$ ,  $\text{Ni}^{2+}$ ,  $\text{Pb}^{2+}$ ,  $\text{Sn}^{2+}$  and  $\text{Zn}^{2+}$  (10 mM, 87.5  $\mu\text{L}$ )) and common anions ( $\text{Br}^-$ ,  $\text{Cl}^-$ ,  $\text{ClO}_4^-$ ,  $\text{CO}_3^{2-}$ ,  $\text{F}^-$ ,  $\text{I}^-$ ,  $\text{NO}_3^-$ ,  $\text{PO}_4^{3-}$ ,  $\text{SCN}^-$  and  $\text{SO}_4^{2-}$  (10 mM, 87.5  $\mu\text{L}$ )) were added under the same conditions.

### Detection of FA

N-GQDs stock solution (500  $\mu\text{L}$ ) was firstly diluted by pure water (3.0 mL) and different amount of FA were added. Then the solutions were further diluted to 5.0 mL. The concentrations of FA in the solutions were 0-200  $\mu\text{M}$ . Then the fluorescence intensities of the mixed solutions were measured and repeated for 3 times. Other interfering compounds (GSH, Glucose, Ser, Gly, Ala, L-Arg, L-Thr, L-Cys, L-Lys, L-Glu, L-His, AA, VB6, niacinamide, CA and Urea (10 mM, 50  $\mu\text{L}$ )) were added under the same conditions.

### Detection of Cr(VI) in actual water samples:

The actual samples selected for the determination of Cr(VI) were tap water, C'estbon bottled drinking water and lake water. Tap water was collected from laboratory water piping, C'estbon bottled drinking water was purchased from the local supermarket and the lake water was collected from Tianyi Lake in Henan University of Chinese Medicine. The practical water samples were centrifuged at 8000 rpm for 20 min and filtered through a 0.22  $\mu\text{m}$  microporous membrane. Then, different amount of Cr(VI) were added into the above water samples to

calculate the recovery rate and relative standard deviation (RSD). All measurements were repeated for 3 times.

#### Detection of FA in FA tablet:

FA tablets (5 mg/tablet) were purchased at a local drugstore. The average weight of 10 tablets was calculated after thorough pulverization into fine powder. An amount of FA powder equal to the mass of one FA tablet was accurately weighed and dissolved in 20 mL pure water with ultrasonic assistance. The solution was centrifuged for 20 min at 8000 rpm and filtered through 0.22  $\mu\text{m}$  membrane syringe filters. The working solution was prepared by diluting the sample solution with pure water to maintain the concentration of the working solution within the linear range. Then, different amount of FA were added into the above working solution to calculate the recovery rate and relative standard deviation (RSD). All measurements were repeated for 3 times.

#### Detection of FA in orange juice:

The orange juice samples were centrifuged at 8000 rpm for 20 min and filtered through a 0.22  $\mu\text{M}$  microporous membrane. The working solution was prepared by diluting the sample solution with pure water to maintain the concentration of the working solution within the linear range. Then, different amount of FA were added into the above working solution to calculate the recovery rate and relative standard deviation (RSD). All measurements were repeated for 3 times.

### 9. Fluorescence detection of Cr(VI)

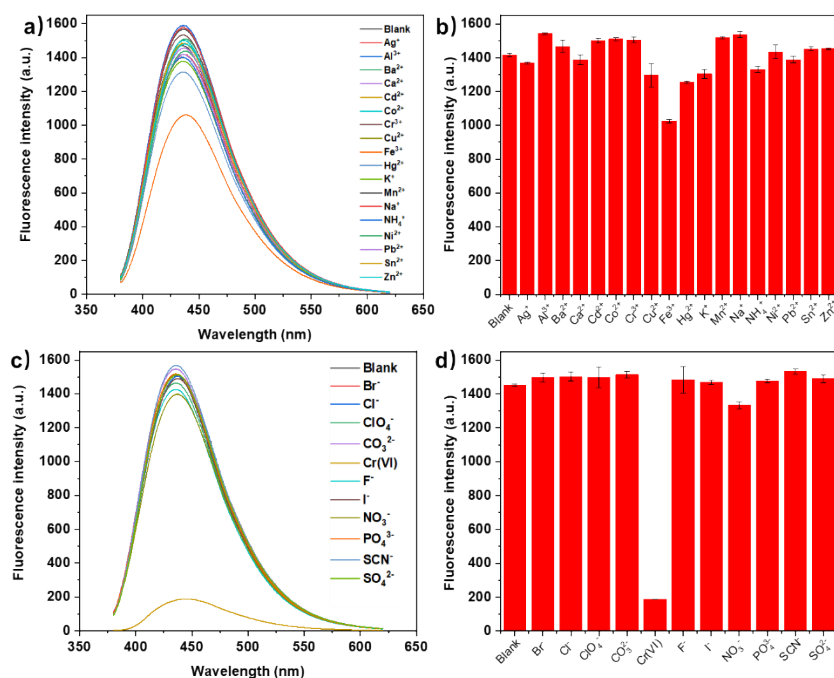

**Fig. S5** Fluorescence spectra (a,c)/intensities (b,d) of N-GQDs ( $\lambda_{\text{ex}} = 370 \text{ nm}$ ,  $\lambda_{\text{em}} = 445 \text{ nm}$ ) with different cations or anions (175  $\mu\text{M}$ ) ( $n = 3$ ).

## 10. Response time of N-GQDs to Cr(VI)

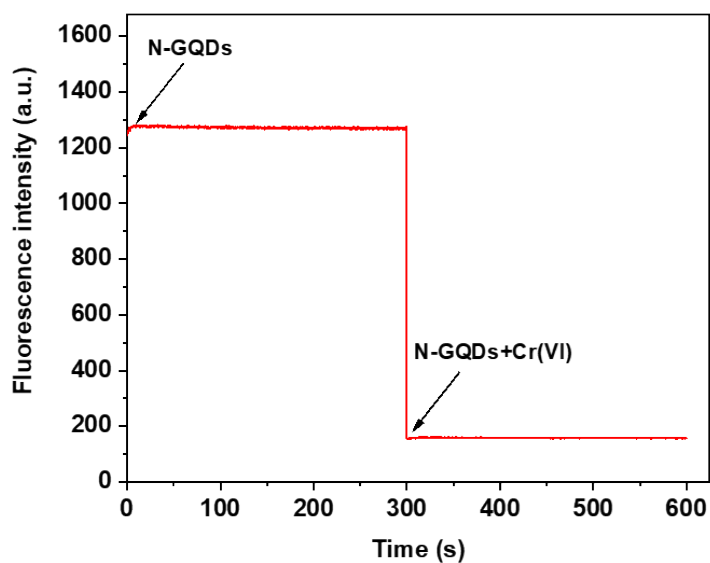

**Fig. S6** Fluorescence intensity of N-GQDs ( $\lambda_{ex} = 370$  nm,  $\lambda_{em} = 445$  nm) in the absence/presence of Cr(VI) (175  $\mu$ M).

## 11. Photographs of N-GQDs solution with Cr(VI)

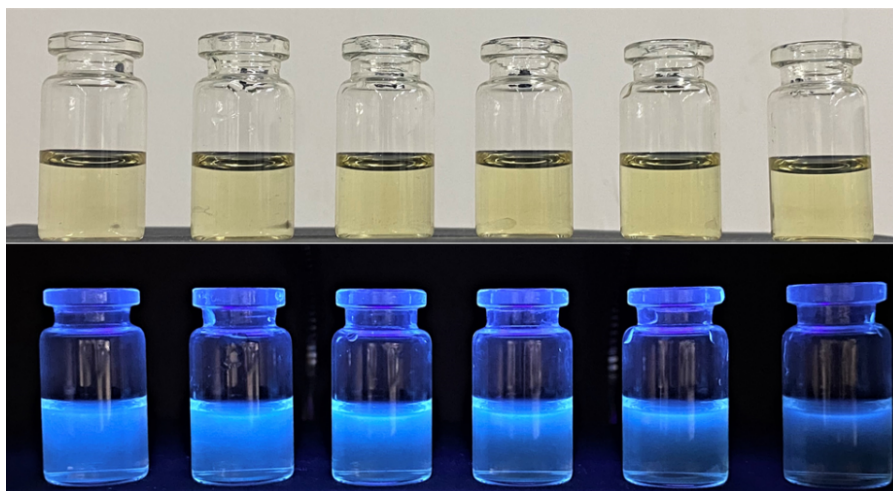

**Fig. S7** Photographs of N-GQDs solution with Cr(VI) (from left to right: 0, 20, 40, 60, 80 and 100  $\mu$ M) under fluorescent lamp (above) and 365 nm UV light (below).

## 12. Table S4 Fluorescence intensity and standard deviation

| No.      | Fluorescence Intensity (a.u.) | $F/F_0$ |
|----------|-------------------------------|---------|
| 1        | 1310                          | 1.0022  |
| 2        | 1312                          | 1.0037  |
| 3        | 1308                          | 1.0007  |
| 4        | 1309                          | 1.0014  |
| 5        | 1304                          | 0.9976  |
| 6        | 1307                          | 0.9999  |
| 7        | 1302                          | 0.9961  |
| 8        | 1302                          | 0.9961  |
| 9        | 1311                          | 1.0030  |
| 10       | 1306                          | 0.9992  |
| $\sigma$ | 0.0026                        |         |

## 13. Fluorescence detection of FA

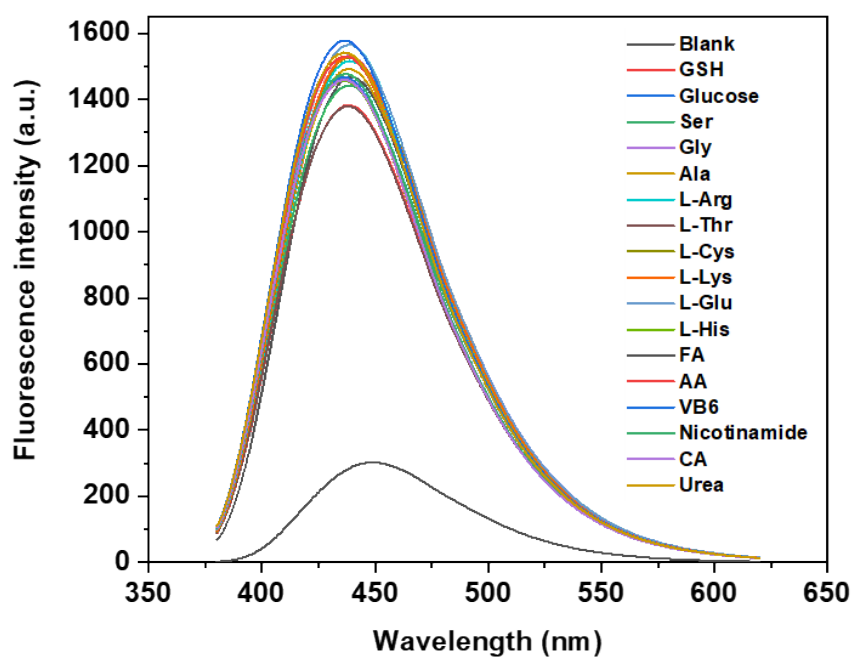

Fig. S8 Fluorescence spectra of N-GQDs ( $\lambda_{\text{ex}} = 370 \text{ nm}$ ,  $\lambda_{\text{em}} = 445 \text{ nm}$ ) with different compounds ( $200 \mu\text{M}$ ).

#### 14. The response time of N-GQDs to FA

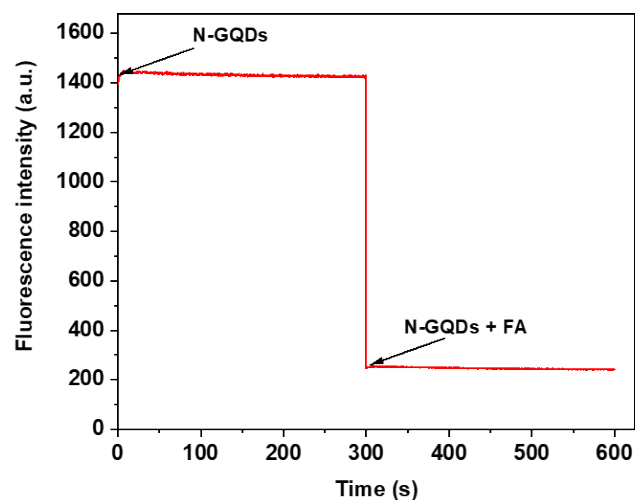

Fig. S9 Fluorescence intensity of N-GQDs ( $\lambda_{ex} = 370$  nm,  $\lambda_{em} = 445$  nm) in the absence/presence of FA (200  $\mu$ M).

#### 15. Photographs of N-GQDs solution with FA

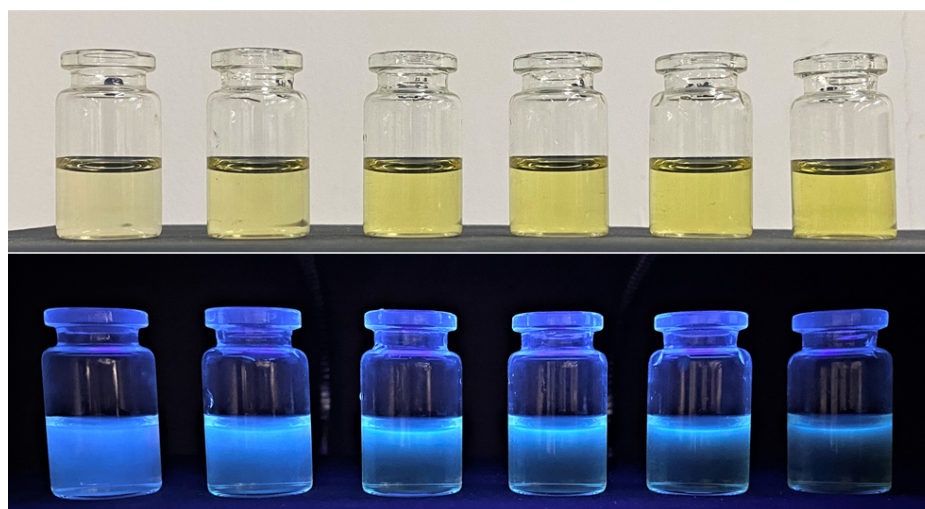

Fig. S10 Photographs of N-GQDs solution with FA (from left to right: 0, 20, 40, 60, 80 and 100  $\mu$ M) under fluorescent lamp (above) and 365 nm UV light (below).

#### 16. Exploration of the quenching mechanism by calculation methods.

$A_{ex}$ ,  $A_{em}$  and  $F_{obsd}$  are the absorbance and fluorescence intensities of N-GQDs at optimal excitation ( $\lambda_{ex} = 370$  nm) and optimal emission ( $\lambda_{em} = 445$  nm).  $F_{cor}$  (corrected fluorescence emission intensities of N-GQDs at 445 nm) was calculated according to Eq. 1 (the Parker's equation). Then,  $CF$  (correction factor),  $E_{obsd}$  (observed fluorescence suppression efficiency),  $E_{cor}$  (corrected fluorescence suppression efficiency) and  $F_{cor.o}/F_{cor}$  (the ratio of corrected fluorescence emission intensities of N-GQDs at 445 nm without/with analytes) were calculated as shown in Table S5 and S6 ( $CF \leq 3$  to ensure the accuracy of the results). The IFE ratio was then calculated by  $(E_{obsd} - E_{cor})/E_{obsd}$  to be 79.74% for Cr(VI) and 90.11% for FA.

The ratio of corrected fluorescence emission intensities of N-GQDs at 445 nm without/with analytes

$(F_{cor,0}/F_{cor})$  versus the concentration of analytes were plotted as shown in Fig S10. In the presence of Cr(VI),  $F_{cor,0}/F_{cor}$  has a linear relationship with the concentration of Cr(VI) (Fig. S10b), which indicates the presence of static quenching effect and dynamic quenching effect in the system according to Stern-Volmer equation (Eq. 2). While,  $F_{cor,0}/F_{cor}$  was not linearly related to FA, which indicated that the static quenching effect and dynamic quenching effect between N-GQDs and FA are negligible.

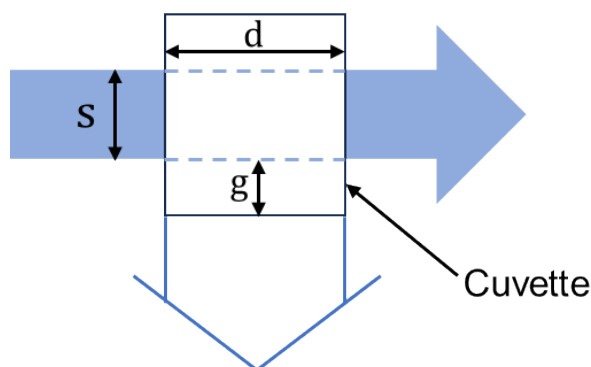

**Fig. S11** Geometry of a quartz cuvette, where  $d$ ,  $g$  and  $s$  are 1.00, 0.25 and 0.50 cm.

**Table S5** Parameters used to calculate the IFE percentage of Cr(VI) to N-GQDs fluorescence

| Cr(VI)<br>( $\mu\text{M}$ ) | $A_{ex}$ | $A_{em}$ | $CF$ | $F_{obsd}$ | $F_{cor}$ | $E_{obsd}$ | $E_{cor}$ | $F_{cor,0}/F_{cor}$ |
|-----------------------------|----------|----------|------|------------|-----------|------------|-----------|---------------------|
| 0                           | 0.34     | 0.06     | 1.55 | 1004.17    | 1556.46   | 0.00       | 0.00      | 1.00                |
| 5                           | 0.41     | 0.07     | 1.69 | 902.00     | 1524.38   | 0.10       | 0.02      | 1.02                |
| 10                          | 0.49     | 0.09     | 1.85 | 806.13     | 1491.35   | 0.20       | 0.04      | 1.04                |
| 15                          | 0.54     | 0.09     | 1.94 | 754.17     | 1463.08   | 0.25       | 0.06      | 1.06                |
| 20                          | 0.59     | 0.10     | 2.03 | 699.57     | 1420.12   | 0.30       | 0.09      | 1.10                |
| 25                          | 0.66     | 0.11     | 2.21 | 622.40     | 1375.50   | 0.38       | 0.12      | 1.13                |

$$CF = F_{cor}/F_{obsd}; E_{obsd} = 1 - F_{obsd}/F_{obsd,0}; E_{cor} = 1 - F_{cor}/F_{cor,0}$$

**Table S6** Parameters used to calculate the IFE percentage of FA to N-GQDs fluorescence

| FA<br>( $\mu\text{M}$ ) | $A_{ex}$ | $A_{em}$ | $CF$ | $F_{obsd}$ | $F_{cor}$ | $E_{obsd}$ | $E_{cor}$ | $F_{cor,0}/F_{cor}$ |
|-------------------------|----------|----------|------|------------|-----------|------------|-----------|---------------------|
| 0                       | 0.39     | 0.10     | 1.71 | 1008.30    | 1724.19   | 0.00       | 0.00      | 1.00                |
| 10                      | 0.47     | 0.11     | 1.85 | 895.77     | 1657.19   | 0.11       | 0.04      | 1.04                |
| 15                      | 0.52     | 0.11     | 1.95 | 854.80     | 1666.86   | 0.15       | 0.03      | 1.03                |
| 20                      | 0.59     | 0.13     | 2.12 | 796.40     | 1688.37   | 0.21       | 0.02      | 1.02                |
| 25                      | 0.64     | 0.13     | 2.22 | 740.33     | 1643.54   | 0.27       | 0.05      | 1.05                |

$$CF = F_{cor}/F_{obsd}; E_{obsd} = 1 - F_{obsd}/F_{obsd,0}; E_{cor} = 1 - F_{cor}/F_{cor,0}$$

$$\frac{F_{cor}}{F_{obsd}} = \frac{2.3dA_{ex}}{1 - 10^{-dA_{ex}}} 10^{gA_{em}} \frac{2.3sA_{em}}{1 - 10^{-sA_{em}}} \quad (\text{Eq. 1})$$

$F_{cor}$  and  $F_{obsd}$  are N-GQDs corrected and measured fluorescence intensities ( $E_m = 445$  nm);  $d$ ,  $g$  and  $s$  are the geometric parameters of the quartz cuvette (Fig. S9) 1.00, 0.25 and 0.50 cm respectively;  $A_{ex}$  and  $A_{em}$  are the absorbance of N-GQDs at optimal excitation ( $E_x = 370$  nm) and optimal emission ( $E_m = 445$  nm).

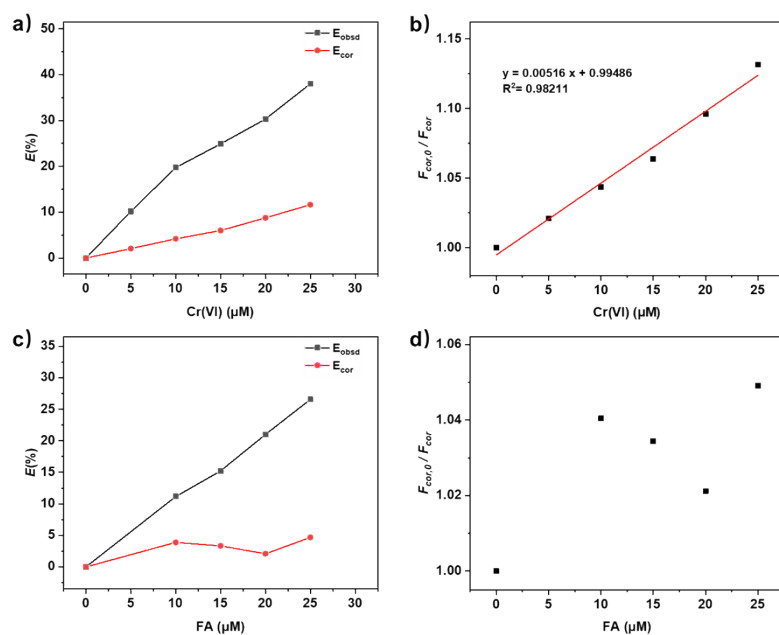

**Fig. S12** Observed and corrected fluorescence intensity suppression efficiency ( $E_{obsd}$  and  $E_{cor}$ ) (a,c); Relationship between Cr(VI) (b) or FA (d) concentrations and  $F_{cor,0}/F_{cor}$ .

$$F_{cor,0}/F_{cor} = 1 + K_{SV}[Q] \quad (\text{Eq. 2})$$

$F_{cor,0}$  and  $F_{cor}$  are corrected fluorescence intensities without and with the addition of Cr(VI) or FA;  $K_{SV}$  is the Stern-Volmer constant;  $[Q]$  is the concentration of Cr(VI) or FA.
